# Supplementary material for: A simple and highly efficient composite based on g-C3N4for super rapid removal of multiple organic dyes from water under sunlight
Source: Royal Society of Chemistry journal article supplement (doi:10.1039/d1cy01689j), 2021-12-15
Supplement: d1cy01689j1.pdf [file d1cy01689j1.pdf]

## Supporting Information

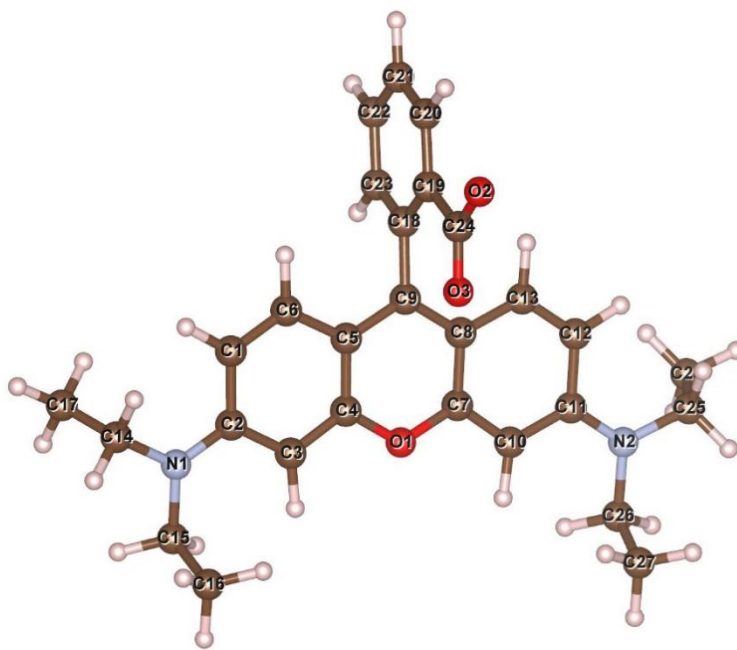

Figure S1. Optimized geometries of RhB

Table S1. Hirshfeld charges and condensed orbital-weighted Fukui indices of RhB

| Atom | Hirshfeld charge | $f^+$  | $f^-$  | $f^0$  |
|------|------------------|--------|--------|--------|
| C1   | -0.0572          | 0.0361 | 0.0295 | 0.0328 |
| C2   | 0.0774           | 0.0518 | 0.0193 | 0.0355 |
| C3   | -0.0880          | 0.0216 | 0.0402 | 0.0309 |
| C4   | 0.1008           | 0.0493 | 0.0180 | 0.0337 |
| C5   | -0.0357          | 0.0400 | 0.0352 | 0.0376 |
| C6   | -0.0180          | 0.0566 | 0.0171 | 0.0369 |
| C7   | 0.1008           | 0.0493 | 0.0180 | 0.0337 |
| C8   | -0.0357          | 0.0400 | 0.0352 | 0.0376 |
| C9   | 0.0825           | 0.1540 | 0.0180 | 0.0860 |
| C10  | -0.0880          | 0.0216 | 0.0402 | 0.0309 |
| C11  | 0.0774           | 0.0518 | 0.0193 | 0.0355 |
| C12  | -0.0572          | 0.0361 | 0.0295 | 0.0328 |
| C13  | -0.0180          | 0.0566 | 0.0171 | 0.0369 |
| C14  | 0.0129           | 0.0038 | 0.0069 | 0.0053 |
| C15  | 0.0126           | 0.0037 | 0.0068 | 0.0052 |
| C16  | -0.0855          | 0.0024 | 0.0057 | 0.0040 |
| C17  | -0.0855          | 0.0023 | 0.0057 | 0.0040 |

|     |         |        |        |        |
|-----|---------|--------|--------|--------|
| C18 | -0.0025 | 0.0328 | 0.0234 | 0.0281 |
| C19 | -0.0263 | 0.0241 | 0.0375 | 0.0308 |
| C20 | -0.0461 | 0.0183 | 0.0246 | 0.0214 |
| C21 | -0.0438 | 0.0173 | 0.0214 | 0.0193 |
| C22 | -0.0417 | 0.0204 | 0.0213 | 0.0209 |
| C23 | -0.0434 | 0.0233 | 0.0216 | 0.0225 |
| C24 | 0.1163  | 0.0088 | 0.0324 | 0.0206 |
| C25 | 0.0129  | 0.0038 | 0.0069 | 0.0053 |
| C26 | 0.0126  | 0.0037 | 0.0068 | 0.0052 |
| C27 | -0.0855 | 0.0024 | 0.0057 | 0.0040 |
| C28 | -0.0855 | 0.0023 | 0.0057 | 0.0040 |
| N1  | -0.0248 | 0.0306 | 0.0544 | 0.0425 |
| N2  | -0.0248 | 0.0306 | 0.0544 | 0.0425 |
| O1  | -0.0745 | 0.0333 | 0.0150 | 0.0242 |
| O2  | -0.4569 | 0.0050 | 0.1293 | 0.0671 |
| O3  | -0.4254 | 0.0197 | 0.1325 | 0.0761 |

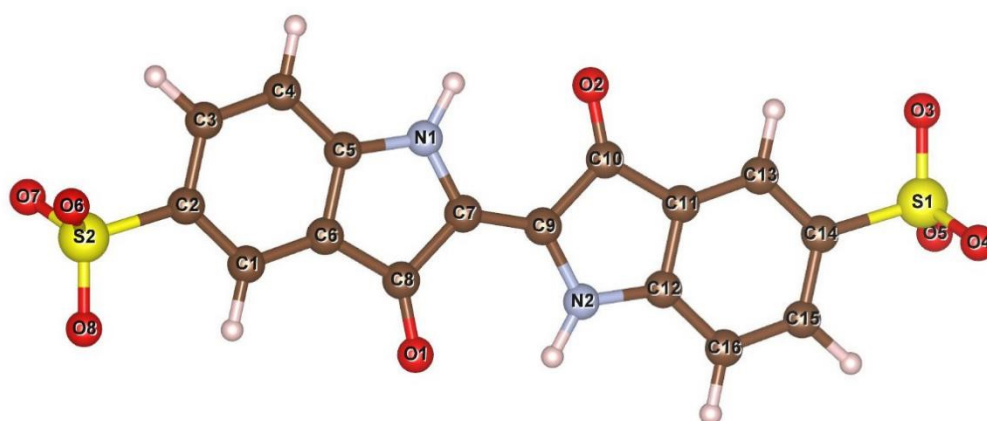

**Figure S2.** Optimized geometries of IC

**Table S2.** Hirshfeld charges and condensed orbital-weighted Fukui indices of IC

| Atom | Hirshfeld charge | $f^+$  | $f^-$  | $f^0$  |
|------|------------------|--------|--------|--------|
| C1   | -0.0226          | 0.0262 | 0.0239 | 0.0250 |
| C2   | -0.0520          | 0.0131 | 0.0413 | 0.0272 |
| C3   | -0.0209          | 0.0287 | 0.0226 | 0.0257 |
| C4   | -0.0448          | 0.0185 | 0.0320 | 0.0252 |
| C5   | 0.0596           | 0.0260 | 0.0270 | 0.0265 |
| C6   | -0.0491          | 0.0206 | 0.0358 | 0.0282 |
| C7   | 0.0294           | 0.0426 | 0.0437 | 0.0431 |
| C8   | 0.1306           | 0.0564 | 0.0187 | 0.0376 |
| C9   | 0.0293           | 0.0426 | 0.0437 | 0.0431 |
| C10  | 0.1306           | 0.0564 | 0.0187 | 0.0376 |
| C11  | -0.0491          | 0.0206 | 0.0358 | 0.0282 |

|     |         |        |        |        |
|-----|---------|--------|--------|--------|
| C12 | 0.0596  | 0.0260 | 0.0270 | 0.0265 |
| C13 | -0.0226 | 0.0262 | 0.0239 | 0.0250 |
| C14 | -0.0520 | 0.0131 | 0.0413 | 0.0272 |
| C15 | -0.0209 | 0.0287 | 0.0226 | 0.0257 |
| C16 | -0.0448 | 0.0185 | 0.0320 | 0.0252 |
| N1  | -0.0657 | 0.0124 | 0.0634 | 0.0379 |
| N2  | -0.0657 | 0.0124 | 0.0634 | 0.0379 |
| O1  | -0.2890 | 0.0527 | 0.0394 | 0.0461 |
| O2  | -0.2890 | 0.0527 | 0.0394 | 0.0461 |
| O3  | -0.4465 | 0.0038 | 0.0359 | 0.0198 |
| O4  | -0.4672 | 0.0042 | 0.0425 | 0.0234 |
| O5  | -0.4694 | 0.0043 | 0.0434 | 0.0238 |
| O6  | -0.4694 | 0.0043 | 0.0434 | 0.0238 |
| O7  | -0.4672 | 0.0042 | 0.0425 | 0.0233 |
| O8  | -0.4465 | 0.0038 | 0.0359 | 0.0199 |
| S1  | 0.4002  | 0.0106 | 0.0175 | 0.0140 |
| S2  | 0.4002  | 0.0106 | 0.0175 | 0.0140 |

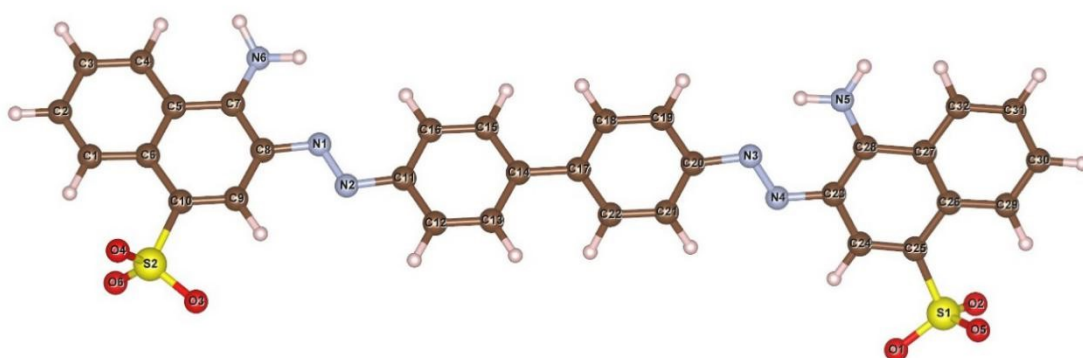

**Figure S3.** Optimized geometries of CR

**Table S3.** Hirshfeld charges and condensed orbital-weighted Fukui indices of CR

| Atom | Hirshfeld charge | $f^+$  | $f^-$  | $f^0$  |
|------|------------------|--------|--------|--------|
| C1   | -0.0494          | 0.0099 | 0.0184 | 0.0142 |
| C2   | -0.0361          | 0.0116 | 0.0148 | 0.0132 |
| C3   | -0.0414          | 0.0100 | 0.0169 | 0.0135 |
| C4   | -0.0413          | 0.0117 | 0.0172 | 0.0145 |
| C5   | -0.0198          | 0.0090 | 0.0164 | 0.0127 |
| C6   | -0.0061          | 0.0100 | 0.0154 | 0.0127 |
| C7   | 0.0642           | 0.0163 | 0.0229 | 0.0196 |
| C8   | -0.0211          | 0.0107 | 0.0365 | 0.0236 |
| C9   | -0.0539          | 0.0126 | 0.0210 | 0.0168 |
| C10  | -0.0588          | 0.0080 | 0.0321 | 0.0200 |

|     |         |        |        |        |
|-----|---------|--------|--------|--------|
| C11 | 0.0093  | 0.0125 | 0.0206 | 0.0166 |
| C12 | -0.0433 | 0.0122 | 0.0156 | 0.0139 |
| C13 | -0.0408 | 0.0102 | 0.0152 | 0.0127 |
| C14 | -0.0019 | 0.0127 | 0.0180 | 0.0153 |
| C15 | -0.0391 | 0.0098 | 0.0149 | 0.0124 |
| C16 | -0.0464 | 0.0132 | 0.0163 | 0.0148 |
| C17 | -0.0042 | 0.0121 | 0.0188 | 0.0155 |
| C18 | -0.0410 | 0.0101 | 0.0154 | 0.0128 |
| C19 | -0.0451 | 0.0116 | 0.0163 | 0.0140 |
| C20 | 0.0110  | 0.0120 | 0.0212 | 0.0166 |
| C21 | -0.0488 | 0.0126 | 0.0171 | 0.0148 |
| C22 | -0.0391 | 0.0097 | 0.0152 | 0.0124 |
| C23 | -0.0207 | 0.0098 | 0.0365 | 0.0232 |
| C24 | -0.0509 | 0.0114 | 0.0208 | 0.0161 |
| C25 | -0.0672 | 0.0068 | 0.0348 | 0.0208 |
| C26 | -0.0055 | 0.0098 | 0.0153 | 0.0125 |
| C27 | -0.0209 | 0.0090 | 0.0176 | 0.0133 |
| C28 | 0.0719  | 0.0165 | 0.0217 | 0.0191 |
| C29 | -0.0504 | 0.0096 | 0.0187 | 0.0142 |
| C30 | -0.0355 | 0.0115 | 0.0143 | 0.0129 |
| C31 | -0.0424 | 0.0097 | 0.0175 | 0.0136 |
| C32 | -0.0408 | 0.0117 | 0.0169 | 0.0143 |
| N1  | -0.0540 | 0.0264 | 0.0272 | 0.0268 |
| N2  | -0.0772 | 0.0255 | 0.0337 | 0.0296 |
| N3  | -0.0646 | 0.0215 | 0.0352 | 0.0284 |
| N4  | -0.0635 | 0.0242 | 0.0285 | 0.0263 |
| N5  | -0.1241 | 0.0097 | 0.0305 | 0.0201 |
| N6  | -0.1485 | 0.0068 | 0.0320 | 0.0194 |
| O1  | -0.4456 | 0.0025 | 0.0173 | 0.0099 |
| O2  | -0.4605 | 0.0026 | 0.0215 | 0.0121 |
| O3  | -0.4443 | 0.0027 | 0.0171 | 0.0099 |
| O4  | -0.4591 | 0.0027 | 0.0212 | 0.0119 |
| O5  | -0.4614 | 0.0026 | 0.0216 | 0.0121 |
| O6  | -0.4597 | 0.0027 | 0.0212 | 0.0119 |
| S1  | 0.4054  | 0.0066 | 0.0101 | 0.0083 |
| S2  | 0.4062  | 0.0068 | 0.0099 | 0.0084 |

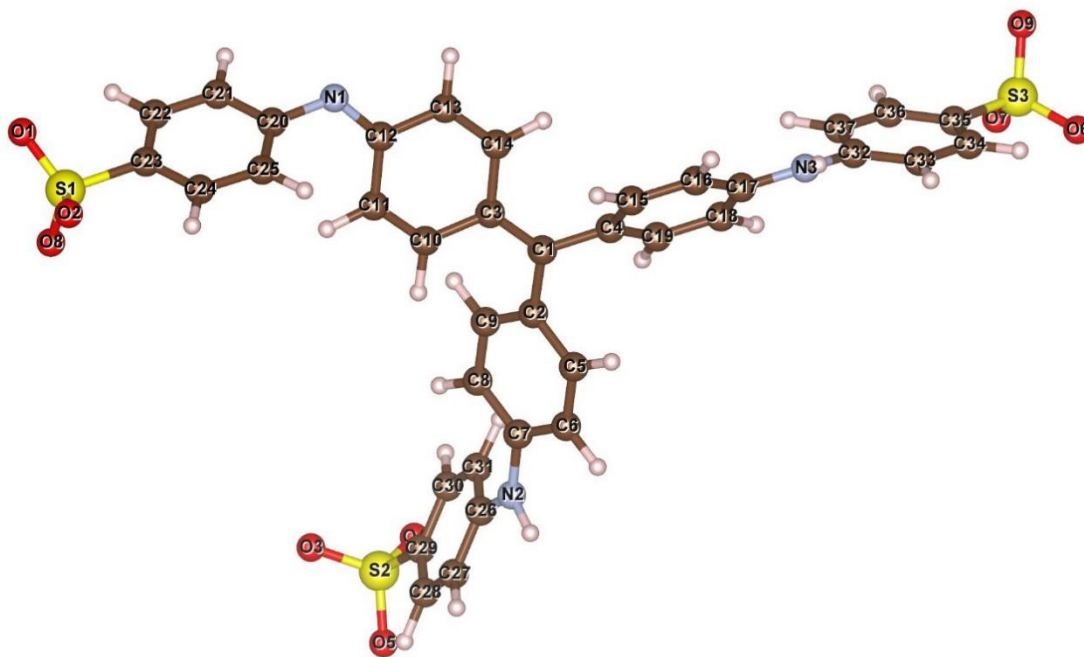

**Figure S4.** Optimized geometries of MB

**Table S4.** Hirshfeld charges and condensed orbital-weighted Fukui indices of MB

| Atom | Hirshfeld charge | $f^+$  | $f^-$  | $f^0$  |
|------|------------------|--------|--------|--------|
| C1   | 0.0339           | 0.0334 | 0.0240 | 0.0287 |
| C2   | -0.0206          | 0.0106 | 0.0243 | 0.0175 |
| C3   | -0.0228          | 0.0150 | 0.0272 | 0.0211 |
| C4   | -0.0204          | 0.0107 | 0.0241 | 0.0174 |
| C5   | -0.0327          | 0.0130 | 0.0139 | 0.0134 |
| C6   | -0.0592          | 0.0109 | 0.0196 | 0.0153 |
| C7   | 0.0535           | 0.0123 | 0.0178 | 0.0150 |
| C8   | -0.0604          | 0.0100 | 0.0203 | 0.0152 |
| C9   | -0.0286          | 0.0130 | 0.0141 | 0.0135 |
| C10  | -0.0264          | 0.0174 | 0.0129 | 0.0151 |
| C11  | -0.0620          | 0.0144 | 0.0230 | 0.0187 |
| C12  | 0.0597           | 0.0176 | 0.0135 | 0.0156 |
| C13  | -0.0620          | 0.0143 | 0.0227 | 0.0185 |
| C14  | -0.0334          | 0.0154 | 0.0134 | 0.0144 |
| C15  | -0.0294          | 0.0128 | 0.0136 | 0.0132 |
| C16  | -0.0594          | 0.0109 | 0.0199 | 0.0154 |
| C17  | 0.0537           | 0.0125 | 0.0177 | 0.0151 |
| C18  | -0.0593          | 0.0103 | 0.0196 | 0.0149 |
| C19  | -0.0315          | 0.0135 | 0.0142 | 0.0139 |
| C20  | 0.0302           | 0.0102 | 0.0197 | 0.0149 |
| C21  | -0.0588          | 0.0104 | 0.0189 | 0.0146 |

|     |         |        |        |        |
|-----|---------|--------|--------|--------|
| C22 | -0.0467 | 0.0092 | 0.0129 | 0.0111 |
| C23 | -0.0541 | 0.0079 | 0.0208 | 0.0143 |
| C24 | -0.0461 | 0.0092 | 0.0131 | 0.0111 |
| C25 | -0.0533 | 0.0097 | 0.0191 | 0.0144 |
| C26 | 0.0483  | 0.0093 | 0.0162 | 0.0127 |
| C27 | -0.0562 | 0.0101 | 0.0184 | 0.0143 |
| C28 | -0.0426 | 0.0096 | 0.0117 | 0.0106 |
| C29 | -0.0549 | 0.0079 | 0.0211 | 0.0145 |
| C30 | -0.0417 | 0.0098 | 0.0119 | 0.0108 |
| C31 | -0.0543 | 0.0094 | 0.0182 | 0.0138 |
| C32 | 0.0485  | 0.0093 | 0.0162 | 0.0128 |
| C33 | -0.0569 | 0.0102 | 0.0188 | 0.0145 |
| C34 | -0.0429 | 0.0095 | 0.0117 | 0.0106 |
| C35 | -0.0553 | 0.0079 | 0.0213 | 0.0146 |
| C36 | -0.0412 | 0.0099 | 0.0119 | 0.0109 |
| C37 | -0.0546 | 0.0095 | 0.0181 | 0.0138 |
| N1  | -0.2055 | 0.0216 | 0.0533 | 0.0374 |
| N2  | -0.0814 | 0.0053 | 0.0393 | 0.0223 |
| N3  | -0.0811 | 0.0053 | 0.0392 | 0.0223 |
| O1  | -0.4609 | 0.0034 | 0.0158 | 0.0096 |
| O2  | -0.4577 | 0.0033 | 0.0154 | 0.0093 |
| O3  | -0.4774 | 0.0040 | 0.0185 | 0.0112 |
| O4  | -0.4601 | 0.0034 | 0.0155 | 0.0094 |
| O5  | -0.4569 | 0.0034 | 0.0149 | 0.0092 |
| O6  | -0.4546 | 0.0034 | 0.0145 | 0.0090 |
| O7  | -0.4639 | 0.0035 | 0.0160 | 0.0098 |
| O8  | -0.4783 | 0.0040 | 0.0188 | 0.0114 |
| O9  | -0.4770 | 0.0039 | 0.0183 | 0.0111 |
| S1  | 0.3972  | 0.0091 | 0.0073 | 0.0082 |
| S2  | 0.3978  | 0.0091 | 0.0073 | 0.0082 |
| S3  | 0.3979  | 0.0092 | 0.0073 | 0.0082 |
